# Supplementary material
Source: PubMed Central journal article supplement (PMC535705)

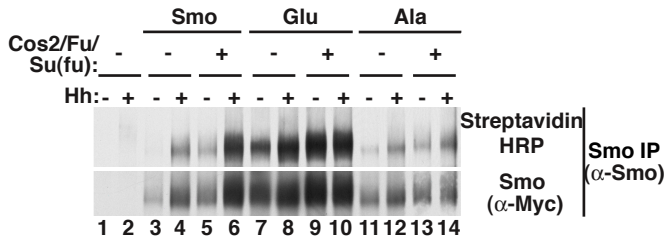

Supplement: pnas_101_52_17900__1.pdf [file pnas_101_52_17900__1.pdf]

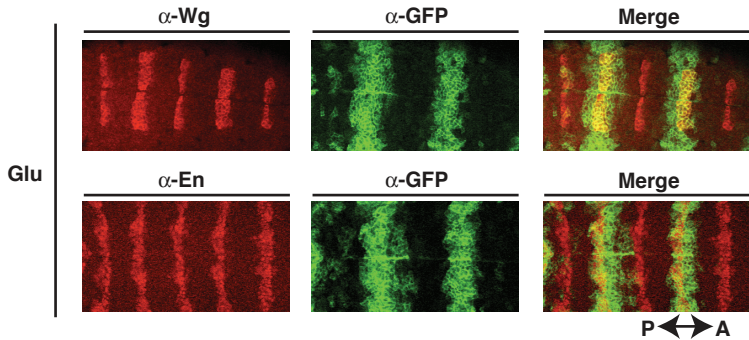

Supplement: pnas_101_52_17900__2.pdf [file pnas_101_52_17900__2.pdf]
